# Supplementary material for: Inverse association of diabetes and dialysis with the severity of femoropopliteal lesions and chronic total occlusion: a cross-sectional study of 2056 cases
Source: Springer Nature journal article supplement (doi:10.1186/s12872-020-01805-6), 2020-12-01
Supplement: MOESM1 [file 18670220]

**Additional file 1: Table S1. Statistical powers**

|                     | TASC II classification | Chronic total occlusion | Lesion length $\geq 25$ cm | Severe calcification |
|---------------------|------------------------|-------------------------|----------------------------|----------------------|
| Diabetes mellitus   | >99.9%                 | 99.9%                   | 97.9%                      | 98.6%                |
| Dialysis dependence | 99.4%                  | 97.9%                   | 88.7%                      | 91.0%                |

Data are statistical powers to detect an adjusted odds ratio of 1.6 (or its reciprocal  $1/1.6 = 0.625$ ) between diabetes mellitus or dialysis dependence and lesion severity, under an assumption of the observed prevalence and correlation among covariates in the study population.

**Additional file 1: Table S2. Association of the clinical characteristics with lesion severity**

|                     | Chronic total occlusion    | Lesion length $\geq 25$ cm | Severe calcification       |
|---------------------|----------------------------|----------------------------|----------------------------|
| Male sex            | 1.26 [1.02-1.56] (P=0.030) | 1.19 [0.91-1.55] (P=0.19)  | 0.97 [0.75-1.25] (P=0.79)  |
| Age (per 10 years)  | 0.85 [0.75-0.95] (P=0.004) | 0.84 [0.73-0.96] (P=0.011) | 1.26 [1.10-1.45] (P=0.001) |
| Current smoking     | 1.34 [1.11-1.63] (P=0.003) | 1.03 [0.81-1.30] (P=0.81)  | 0.97 [0.76-1.24] (P=0.81)  |
| Hypertension        | 1.05 [0.81-1.37] (P=0.70)  | 0.98 [0.71-1.36] (P=0.93)  | 1.23 [0.87-1.74] (P=0.25)  |
| Hyperlipidemia      | 0.86 [0.71-1.05] (P=0.13)  | 0.95 [0.75-1.21] (P=0.68)  | 1.02 [0.80-1.29] (P=0.88)  |
| Diabetes mellitus   | 0.74 [0.62-0.90] (P=0.002) | 0.76 [0.61-0.96] (P=0.021) | 1.55 [1.22-1.96] (P<0.001) |
| Dialysis dependence | 0.40 [0.31-0.51] (P<0.001) | 0.85 [0.63-1.14] (P=0.28)  | 4.62 [3.57-5.98] (P<0.001) |
| Severe claudication | 1.79 [1.47-2.17] (P<0.001) | 1.41 [1.11-1.80] (P=0.005) | 1.09 [0.86-1.38] (P=0.48)  |

Data are adjusted odds ratios and 95% confidence intervals for lesion severity, derived from the multivariate model in which all the variables listed in the table were entered.
